# Supplementary material for: Kangaroo mother care: EN-BIRTH multi-country validation study
Source: PubMed Central journal article supplement (PMC7995571; doi:10.1186/s12884-020-03423-8), 2021-03-26
Supplement: 12884_2020_3423_MOESM2_ESM.pdf [file 12884_2020_3423_MOESM2_ESM.pdf]

*Every Newborn* BIRTH multi-country validation study: informing measurement of coverage and quality of maternal and newborn care

### **Kangaroo mother care: EN-BIRTH multi-country validation study**

Additional file 2: Metadata definitions of selected indicators for validity testing, EN-BIRTH study

| Indicator                   | Numerator                                |                                                                                                                                                                             | Denominator used for analyses in this paper |
|-----------------------------|------------------------------------------|-----------------------------------------------------------------------------------------------------------------------------------------------------------------------------|---------------------------------------------|
| <b>Kangaroo Mother Care</b> | Observed to:                             | Receive Kangaroo Mother Care during admission (KMC position and/or Skin-To-Skin care)                                                                                       | All babies observed on KMC ward/corner      |
|                             | Survey maternal report, answered yes to: | "Was your baby born early/ Baby born before the expected date of delivery /born too soon or too small and had extra care" and "Did your baby receive Kangaroo Mother Care?" |                                             |
|                             | Register Data Extraction, documented:    | In Kangaroo Mother Care register                                                                                                                                            |                                             |

Observation compared to women's exit survey report or register, data extraction
