# Supplementary material for: Kangaroo mother care: EN-BIRTH multi-country validation study
Source: PubMed Central journal article supplement (PMC7995571; doi:10.1186/s12884-020-03423-8), 2021-03-26
Supplement: 12884_2020_3423_MOESM4_ESM.pdf [file 12884_2020_3423_MOESM4_ESM.pdf]

Every Newborn BIRTH multi-country validation study: informing measurement of coverage and quality of maternal and newborn care

## Kangaroo mother care: EN-BIRTH multi-country validation study

Additional file 4: Routine register design in five EN-BIRTH study hospitals and data quality dimensions

|                                             |                                         | Bangladesh              |                         | Nepal                     | Tanzania                |                         |
|---------------------------------------------|-----------------------------------------|-------------------------|-------------------------|---------------------------|-------------------------|-------------------------|
|                                             |                                         | Azimpur Tertiary        | Kushtia District        | Pokhara Regional          | Temeke Regional         | Muhimbili National      |
| <b>Kangaroo Mother Care</b>                 |                                         |                         |                         |                           |                         |                         |
| <b>Register design:</b>                     |                                         | specific KMC register   | specific KMC register   | non-specific newborn      | specific KMC register   | specific KMC register   |
| Column heading                              |                                         | 23 specific columns     | 23 specific columns     | KMC partial or continuous | 38 specific columns     | 38 specific columns     |
| Data element completed if KMC initiated     |                                         | entered in register     | entered in register     | tick                      | entered in register     | entered in register     |
| Data element completed if KMC not initiated |                                         | not entered in register | not entered in register | blank                     | not entered in register | not entered in register |
| <b>Completeness</b>                         | Data element recorded in register       | 100.0%                  | 98.5%                   | 93.0%                     | 99.1%                   | 98.8%                   |
| <b>External Consistency</b>                 |                                         |                         |                         |                           |                         |                         |
| <i>Indicator:</i>                           | Observed coverage %                     | 100.0%                  | 99.9%                   | 99.9%                     | 99.8%                   | 99.5%                   |
| <i>Indicator:</i>                           | Measured coverage - register recorded % | 100.0%                  | 97.8%                   | 21.2%                     | 84.8%                   | 85.2%                   |
| <i>Measurement gap</i>                      | Register recorded and observed          | 0.0%                    | 2.1%                    | 78.7% underestimate       | 15.0% underestimate     | 14.3% underestimate     |

### Key

|                                      |
|--------------------------------------|
| no column for data element           |
| non-specific column for data element |
| specific column                      |

|        |           |
|--------|-----------|
| >20%   | Poor      |
| 16-20% | Moderate  |
| 11-15% | Good      |
| 6-10%  | Very Good |
| 0-5%   | Excellent |

Register design: specific column, non-specific column, no column

Data quality dimensions: completeness and external consistency compared to gold standard observation

Heat mapped showing cut-offs
