# Supplementary material for: Kangaroo mother care: EN-BIRTH multi-country validation study
Source: PubMed Central journal article supplement (PMC7995571; doi:10.1186/s12884-020-03423-8), 2021-03-26

*Every Newborn* BIRTH multi-country validation study: informing measurement of coverage and quality of maternal and newborn care

### **Kangaroo mother care: EN-BIRTH multi-country validation study**

Additional File 10: Box plots KMC daily dose: upright/vertical position, skin-to-skin, EN-BIRTH study Temeke Hospital, Tanzania (n=6,804 point observations)

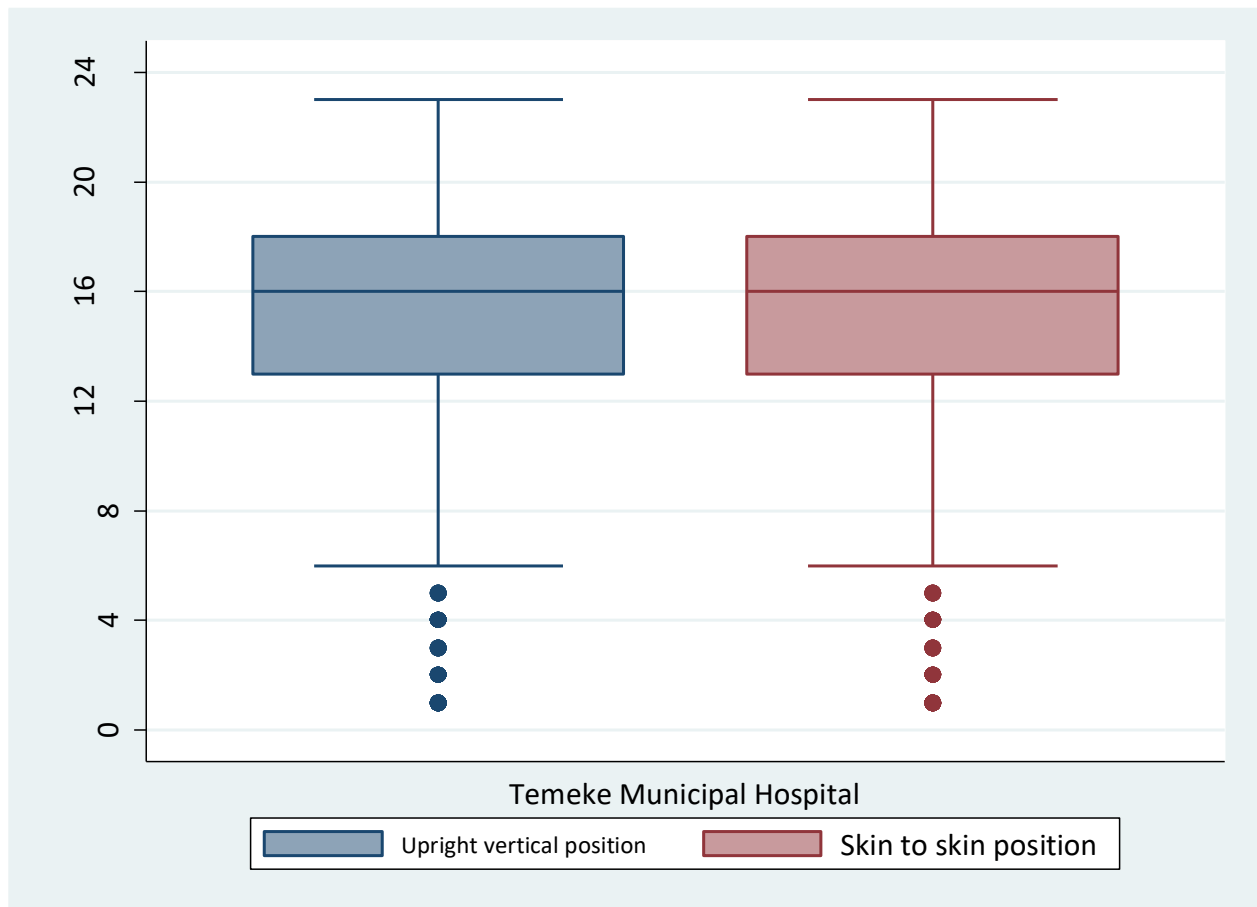

Supplement: 12884_2020_3423_MOESM10_ESM.pdf [file 12884_2020_3423_MOESM10_ESM.pdf]
