# Supplementary material for: Kangaroo mother care: EN-BIRTH multi-country validation study
Source: PubMed Central journal article supplement (PMC7995571; doi:10.1186/s12884-020-03423-8), 2021-03-26

Every Newborn BIRTH multi-country validation study: informing measurement of coverage and quality of maternal and newborn care

**Kangaroo mother care: EN-BIRTH multi-country validation study**

Additional File 11: Observed feeding practices for KMC mother-baby pairs, EN-BIRTH study Tanzania sites (n=22,793 point observations)

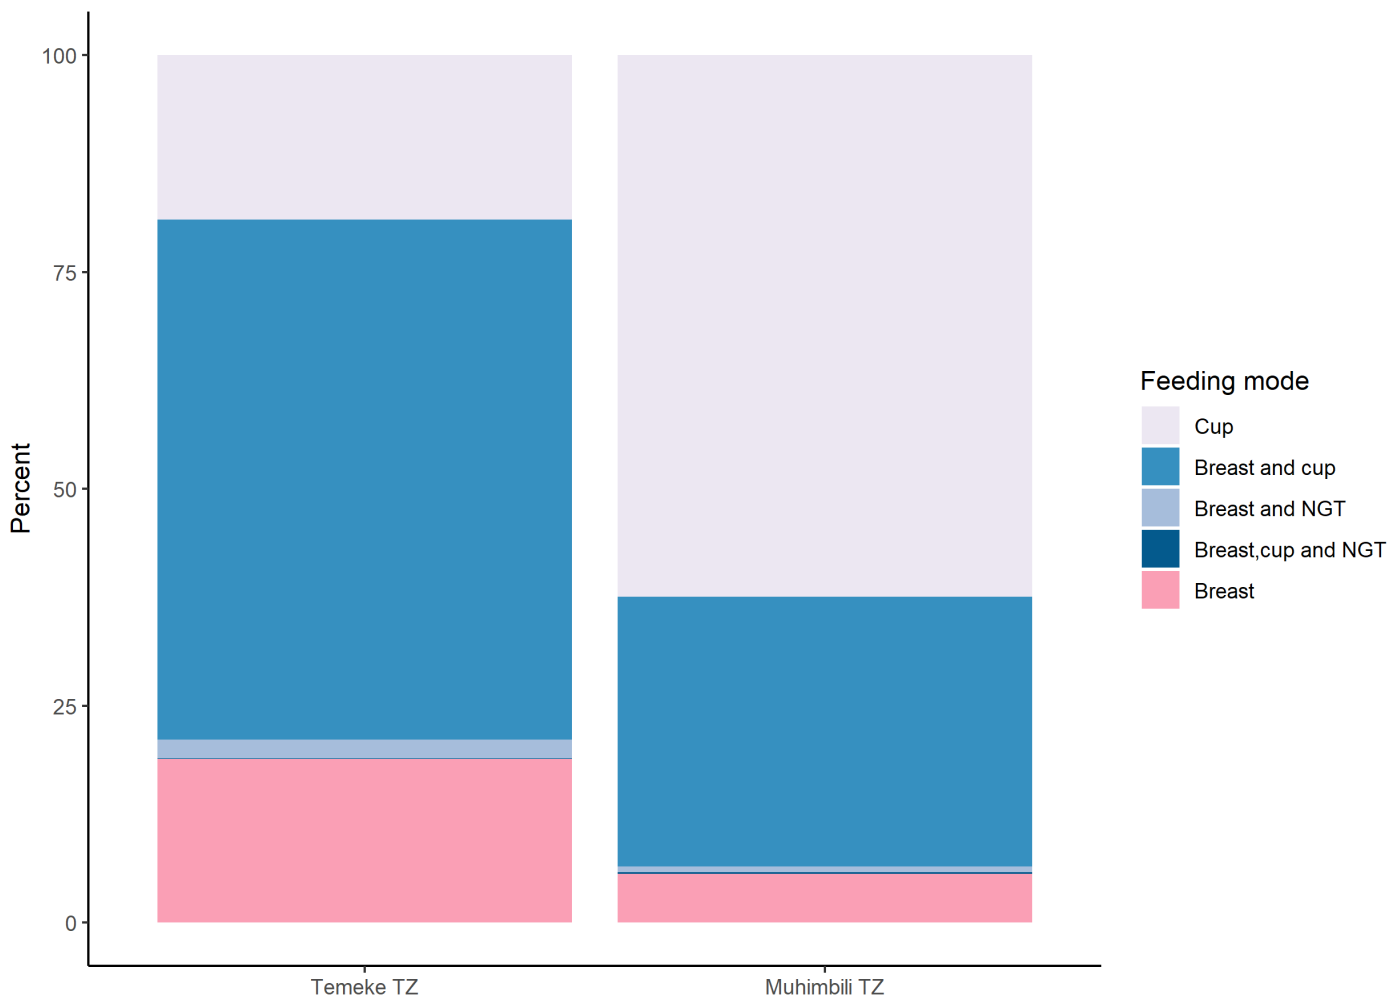

Supplement: 12884_2020_3423_MOESM11_ESM.pdf [file 12884_2020_3423_MOESM11_ESM.pdf]
