# Supplementary material for: Kangaroo mother care: EN-BIRTH multi-country validation study
Source: PubMed Central journal article supplement (PMC7995571; doi:10.1186/s12884-020-03423-8), 2021-03-26

Every Newborn BIRTH multi-country validation study: informing measurement of coverage and quality of maternal and newborn care

**Kangaroo mother care: EN-BIRTH multi-country validation study**

Additional file 12: Flow diagram for analyses of KMC continuity – Tanzania sites, ≤2000g EN-BIRTH study

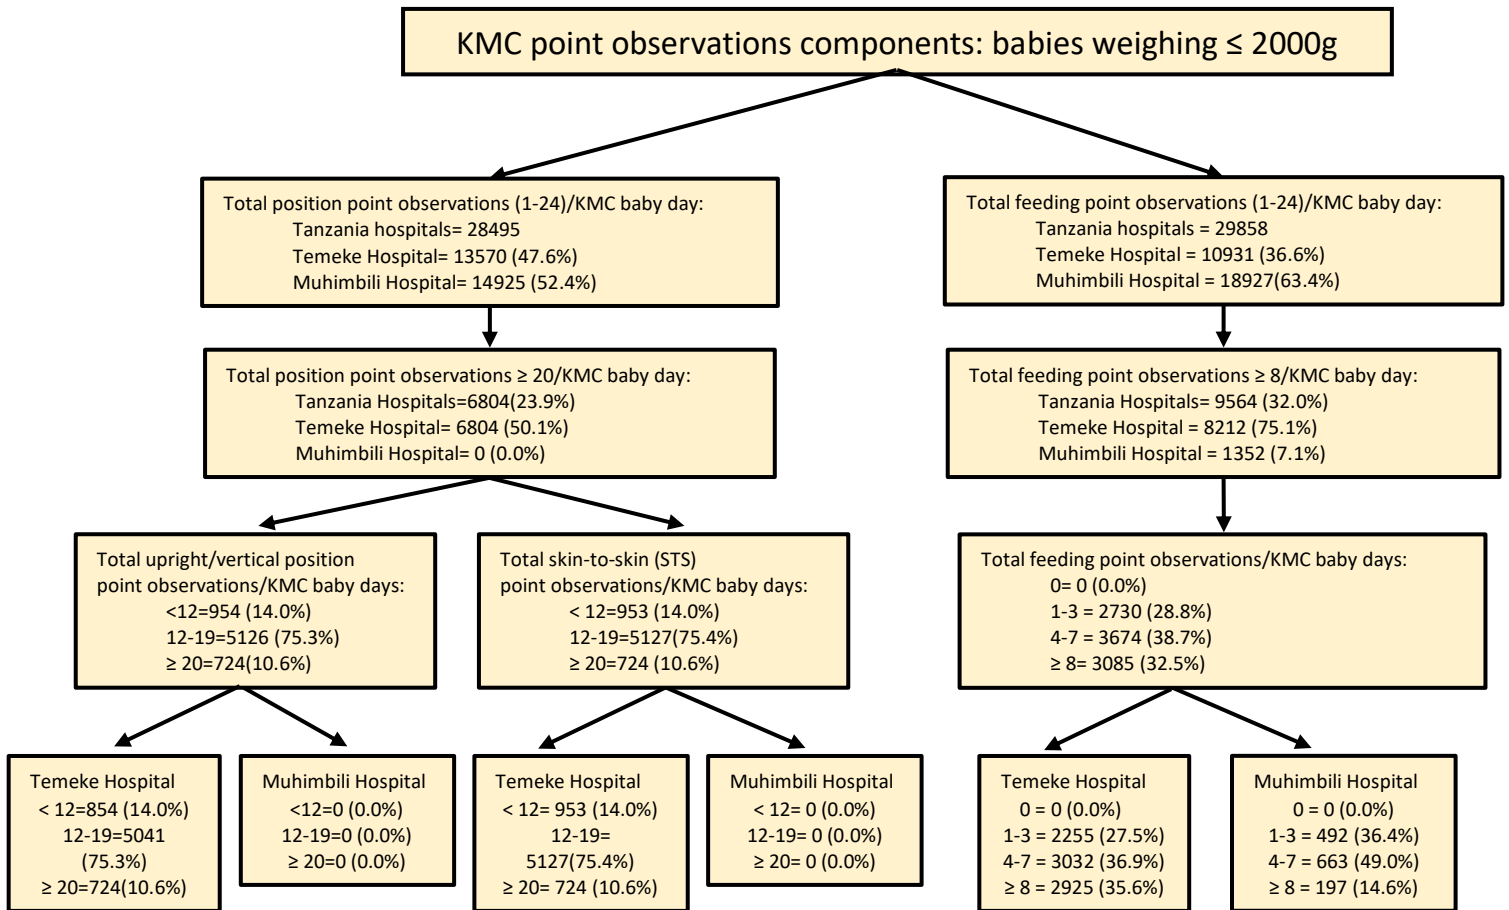

Supplement: 12884_2020_3423_MOESM12_ESM.pdf [file 12884_2020_3423_MOESM12_ESM.pdf]
