# Supplementary material for: Kangaroo mother care: EN-BIRTH multi-country validation study
Source: PubMed Central journal article supplement (PMC7995571; doi:10.1186/s12884-020-03423-8), 2021-03-26

Every Newborn BIRTH multi-country validation study: informing measurement of coverage and quality of maternal and newborn care

## Kangaroo mother care: EN-BIRTH multi-country validation study

Additional File 13: Barriers and Enablers to Routine Reporting and Documentation for KMC in the EN-BIRTH study

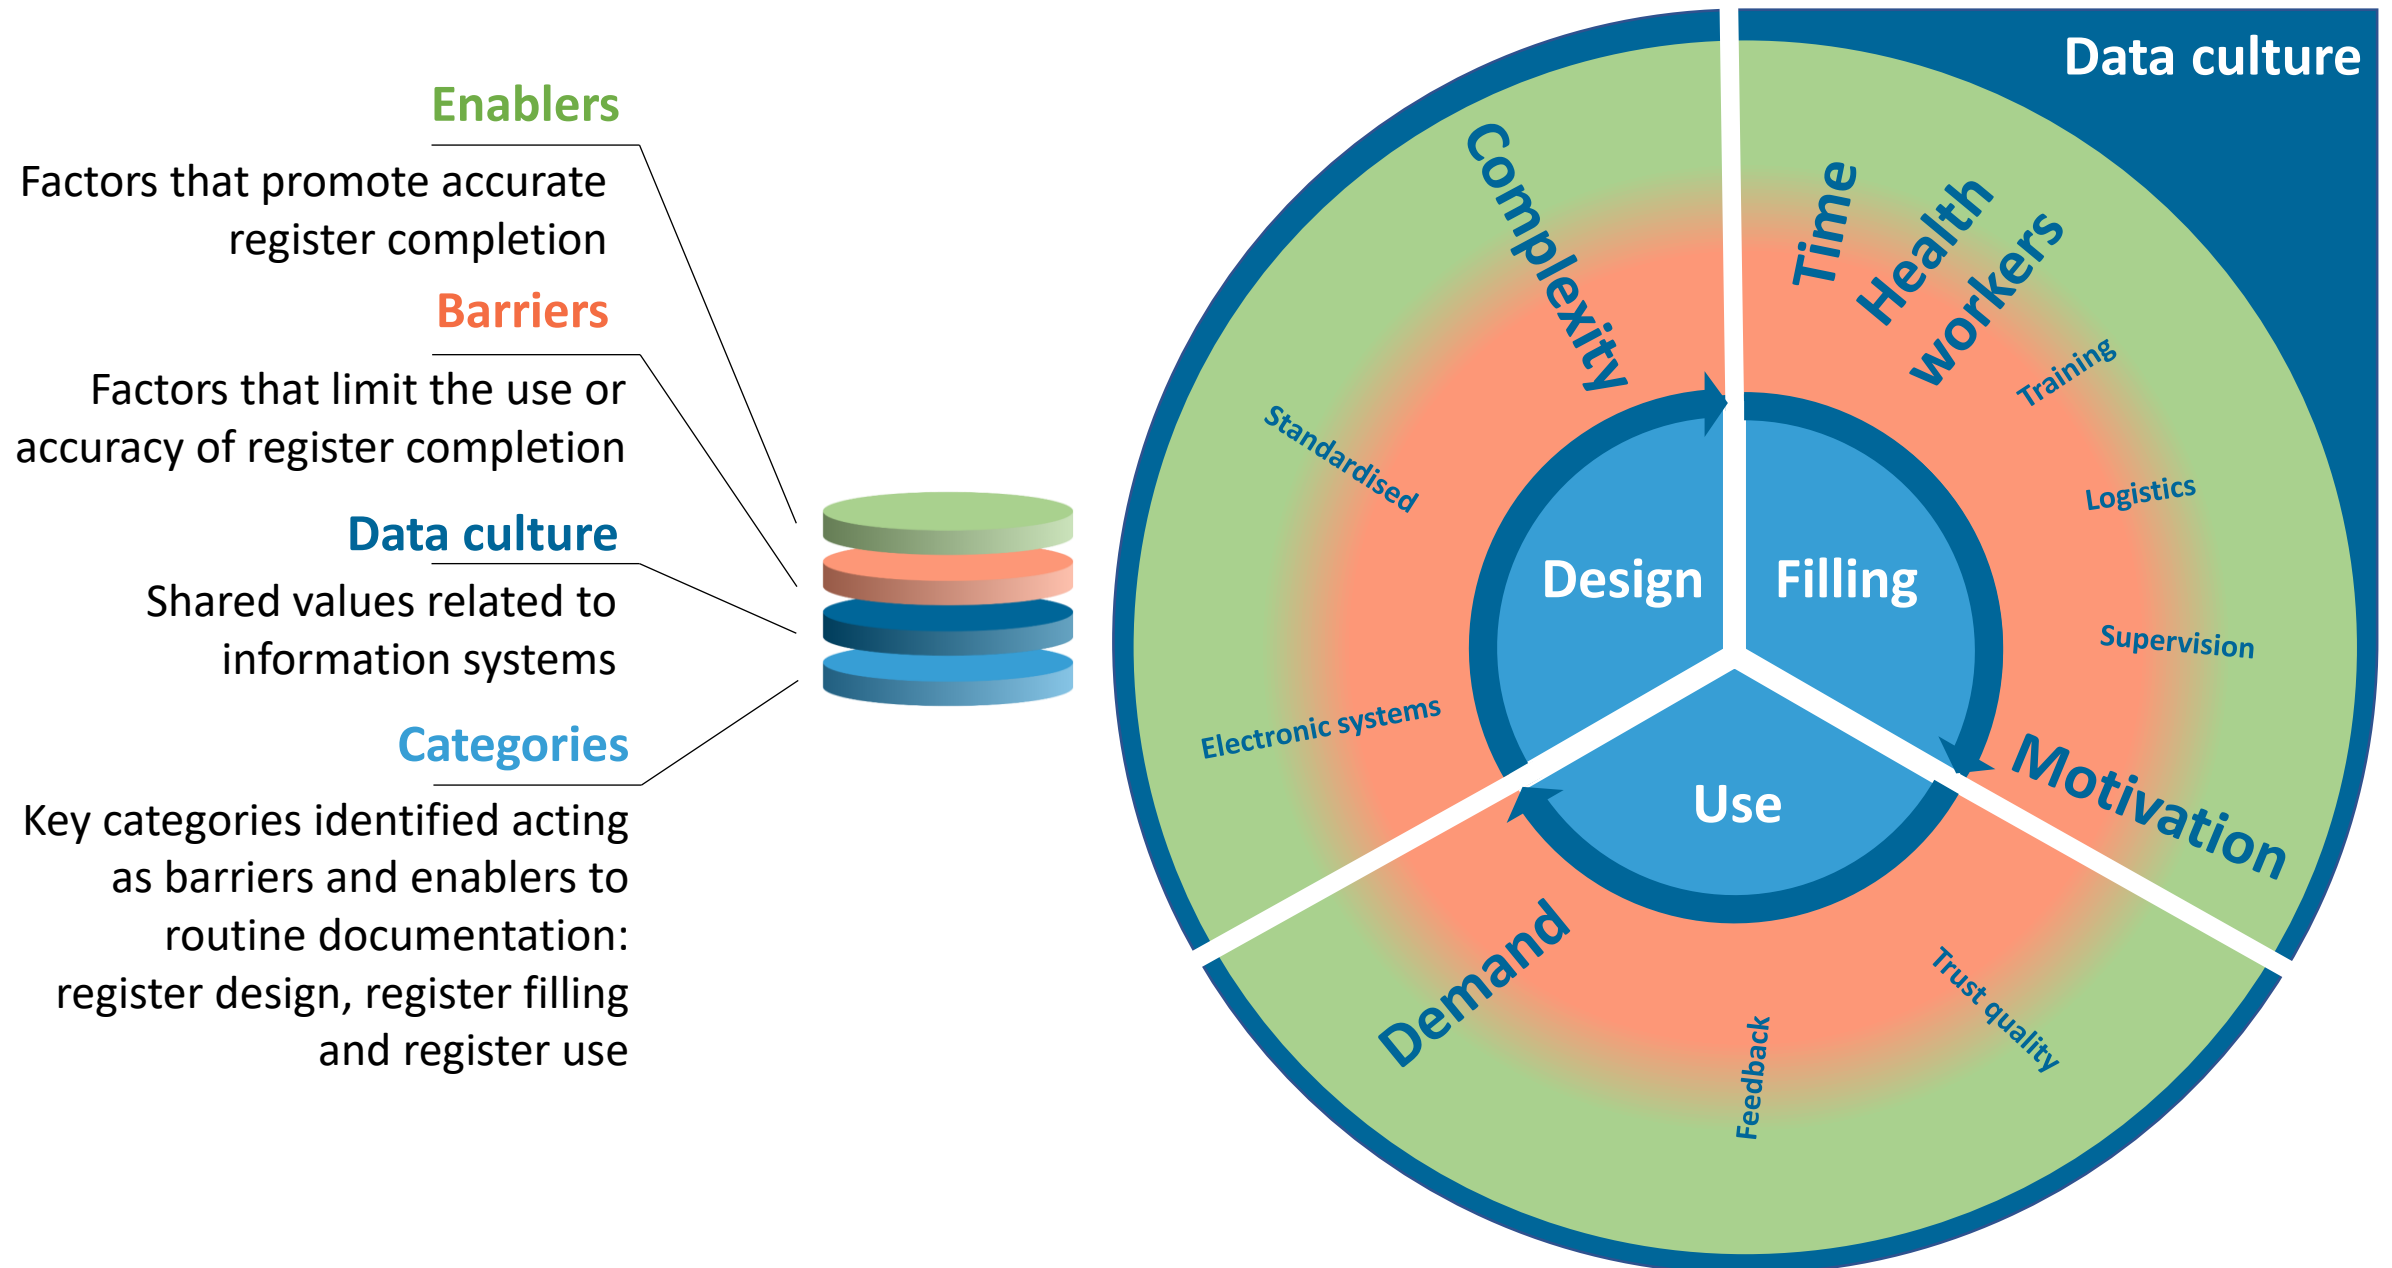

Supplement: 12884_2020_3423_MOESM13_ESM.pdf [file 12884_2020_3423_MOESM13_ESM.pdf]
